# Supplementary material for: Sensory-Motor Perturbations in Larval Zebrafish (Danio rerio) Induced by Exposure to Low Levels of Neuroactive Micropollutants during Development
Source: MDPI journal article supplement (doi:10.3390/ijms23168990), 2022-08-12
Supplement: s1 [file s1]

## Electronic supplementary data

# Sensory-Motor Perturbations in Larval Zebrafish (*Danio rerio*) Induced by Exposure to Low Levels of Neuroactive Micropollutants during Development

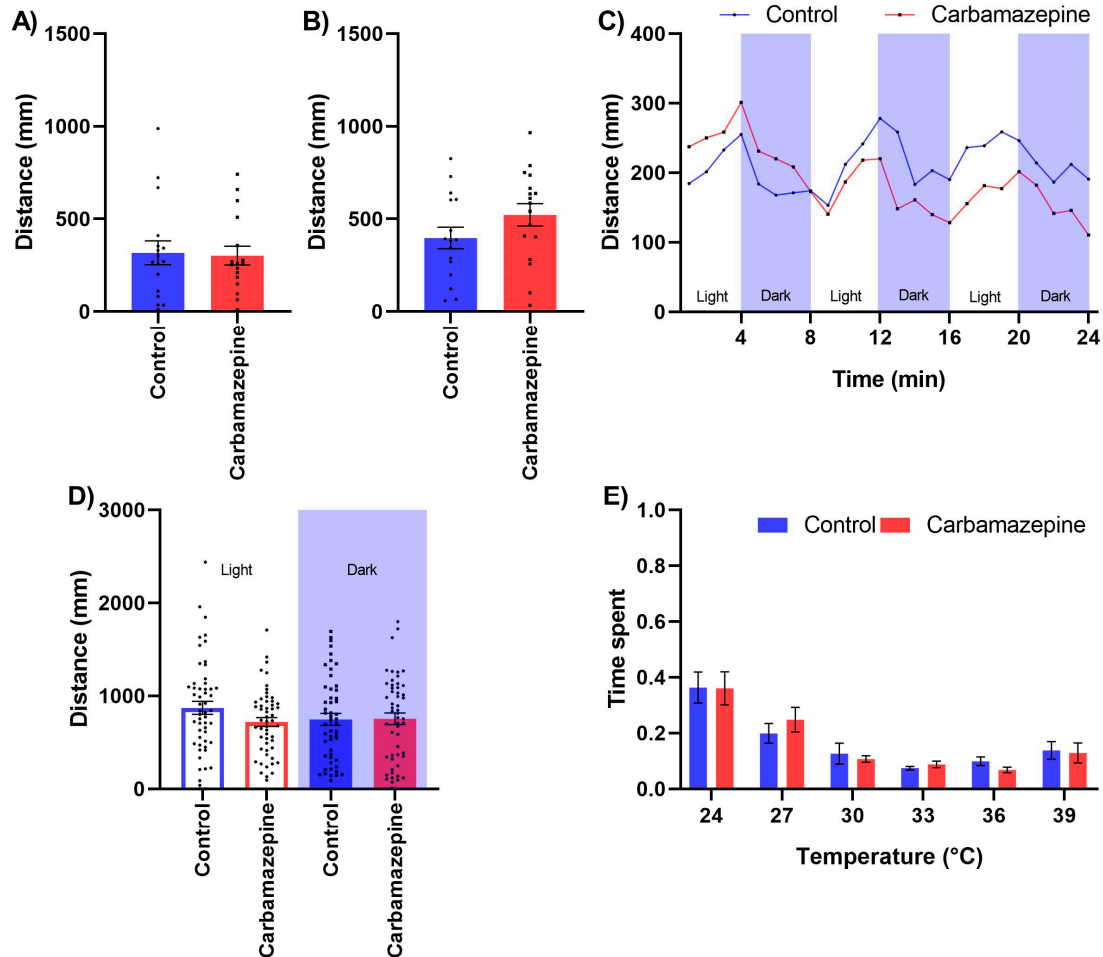

**Figure S1.** The effects of carbamazepine (3000 ng/L) on wild type zebrafish behaviours during the testing battery. The behavioural battery included (A) Spontaneous swimming, (B) SPR, (C) Time resolved LPR, (D) LPR cumulated comparison and (E) Thermotaxis assay. Note \*  $0.05 > p > 0.01$ , \*\*  $0.01 > p > 0.001$  and \*\*\*  $p < 0.001$ .

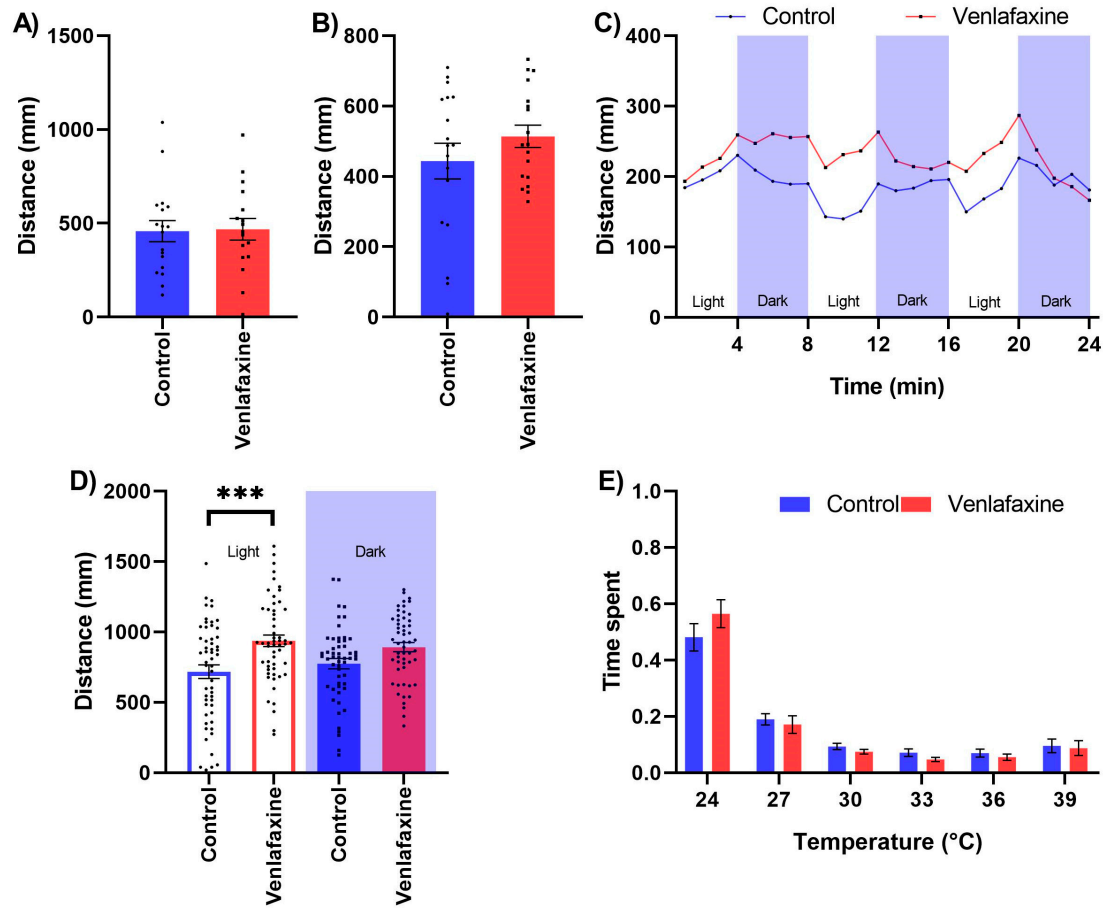

**Figure S2.** The effects of venlafaxine (2200 ng/L) on wild type zebrafish behaviours undergoing the testing battery. The behavioural battery included (A) Spontaneous swimming, (B) SPR, (C) Time resolved LPR, (D) LPR cumulated comparison and (E) Thermotaxis assay. Note \*  $0.05 > p > 0.01$ , \*\*  $0.01 > p > 0.001$  and \*\*\*  $p < 0.001$ .
